# Supplementary material for: H19-Dependent Transcriptional Regulation of β3 and β4 Integrins Upon Estrogen and Hypoxia Favors Metastatic Potential in Prostate Cancer
Source: MDPI journal article supplement (doi:10.3390/ijms20164012), 2019-08-17
Supplement: s1 [file s1]

a

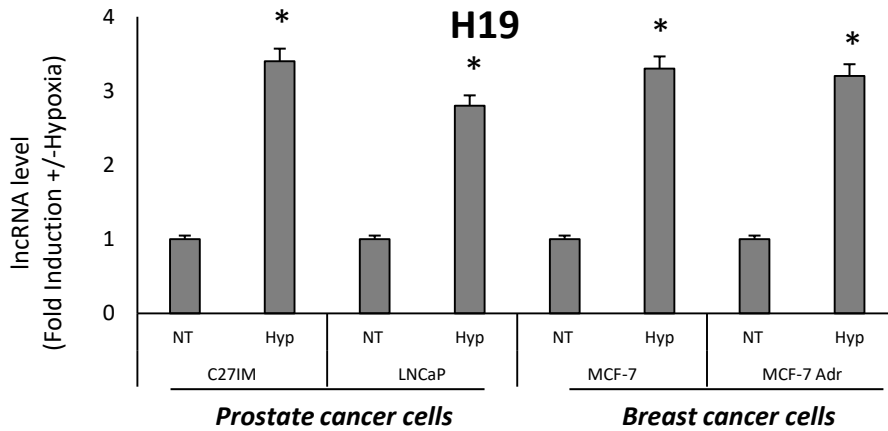

b

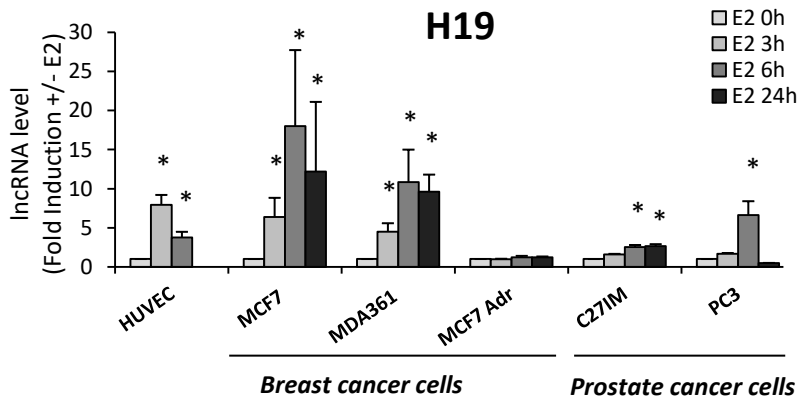

**Figure S1. Estrogen- or hypoxia-dependent H19 expression in prostate and breast cancer cells.**

a) H19 level was assessed by quantitative RT-PCR in Prostate cancer (C27IM and LNCaP) and in Breast cancer (MCF-7, MCF-7 Adr) cells in normoxia (NT) or hypoxia (Hyp, 1% O<sub>2</sub>, 18 hours). Data, plotted as fold induction vs NT, represent mean ± SEM of 3 experiments. \*p<0,05 vs NT. b) H19 level was assessed by quantitative RT-PCR in normal human endothelial cell line HUVEC, Breast cancer (MCF-7, MDA361, MCF7 Adr) and in Prostate cancer (C27IM and PC3) cells in basal condition (E2 0h) and at 3h, 6h and 24h upon treatment with E2 (10<sup>-7</sup>M). Data, plotted as fold induction, represent mean ± SEM of 3 experiments. \*p<0,05 vs NT.

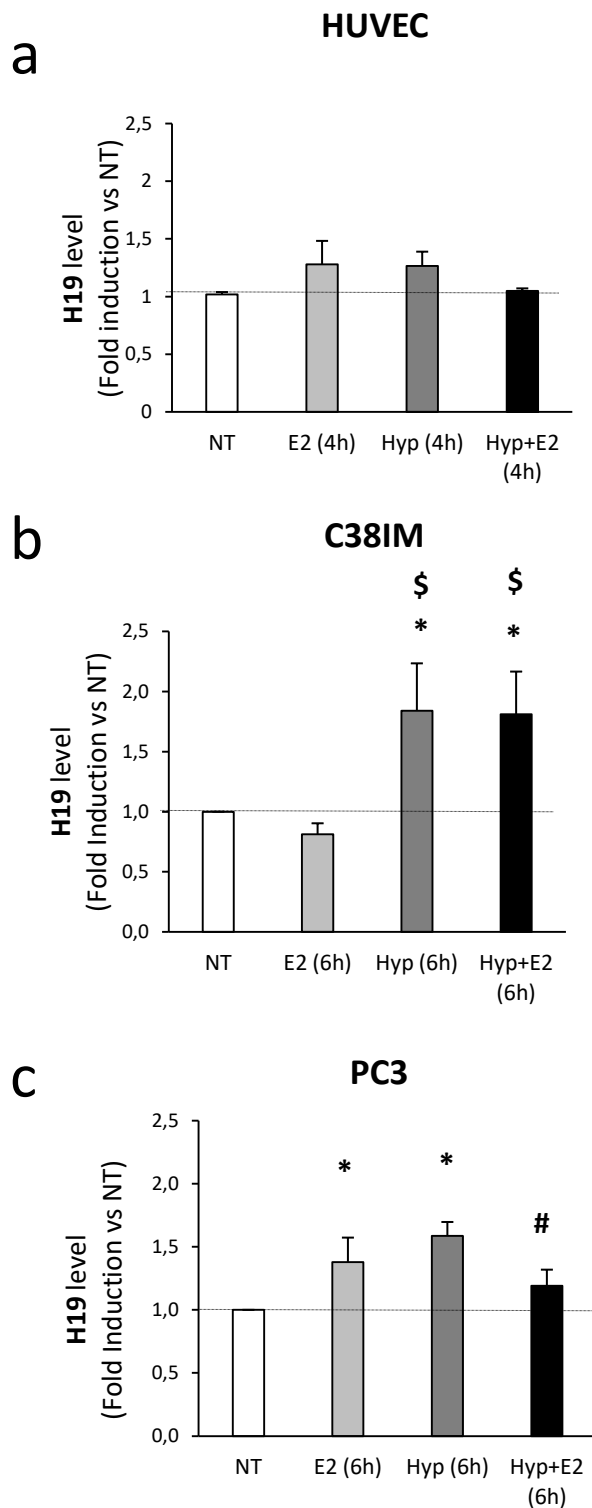

**Figure S2. H19 regulation by hypoxia and estrogen treatment in normal and transformed cell lines.** H19 level was assessed in normal cells (HUVEC, a), in cells derived from clinically-localized prostate cancer (C38IM, b) and from prostate cancer metastasis-derived cell line (PC3, c) by quantitative RT-PCR after 4 or 6 hours treatment with E2 ( $10^{-7}$ M) and 1% O<sub>2</sub> hypoxia (Hyp), alone or in combination. Data, plotted as fold induction, represent mean  $\pm$  SEM of 3 experiments. \* $p < 0,05$  vs NT; \$  $p < 0,05$  vs E2; #  $p < 0,05$  vs Hyp.

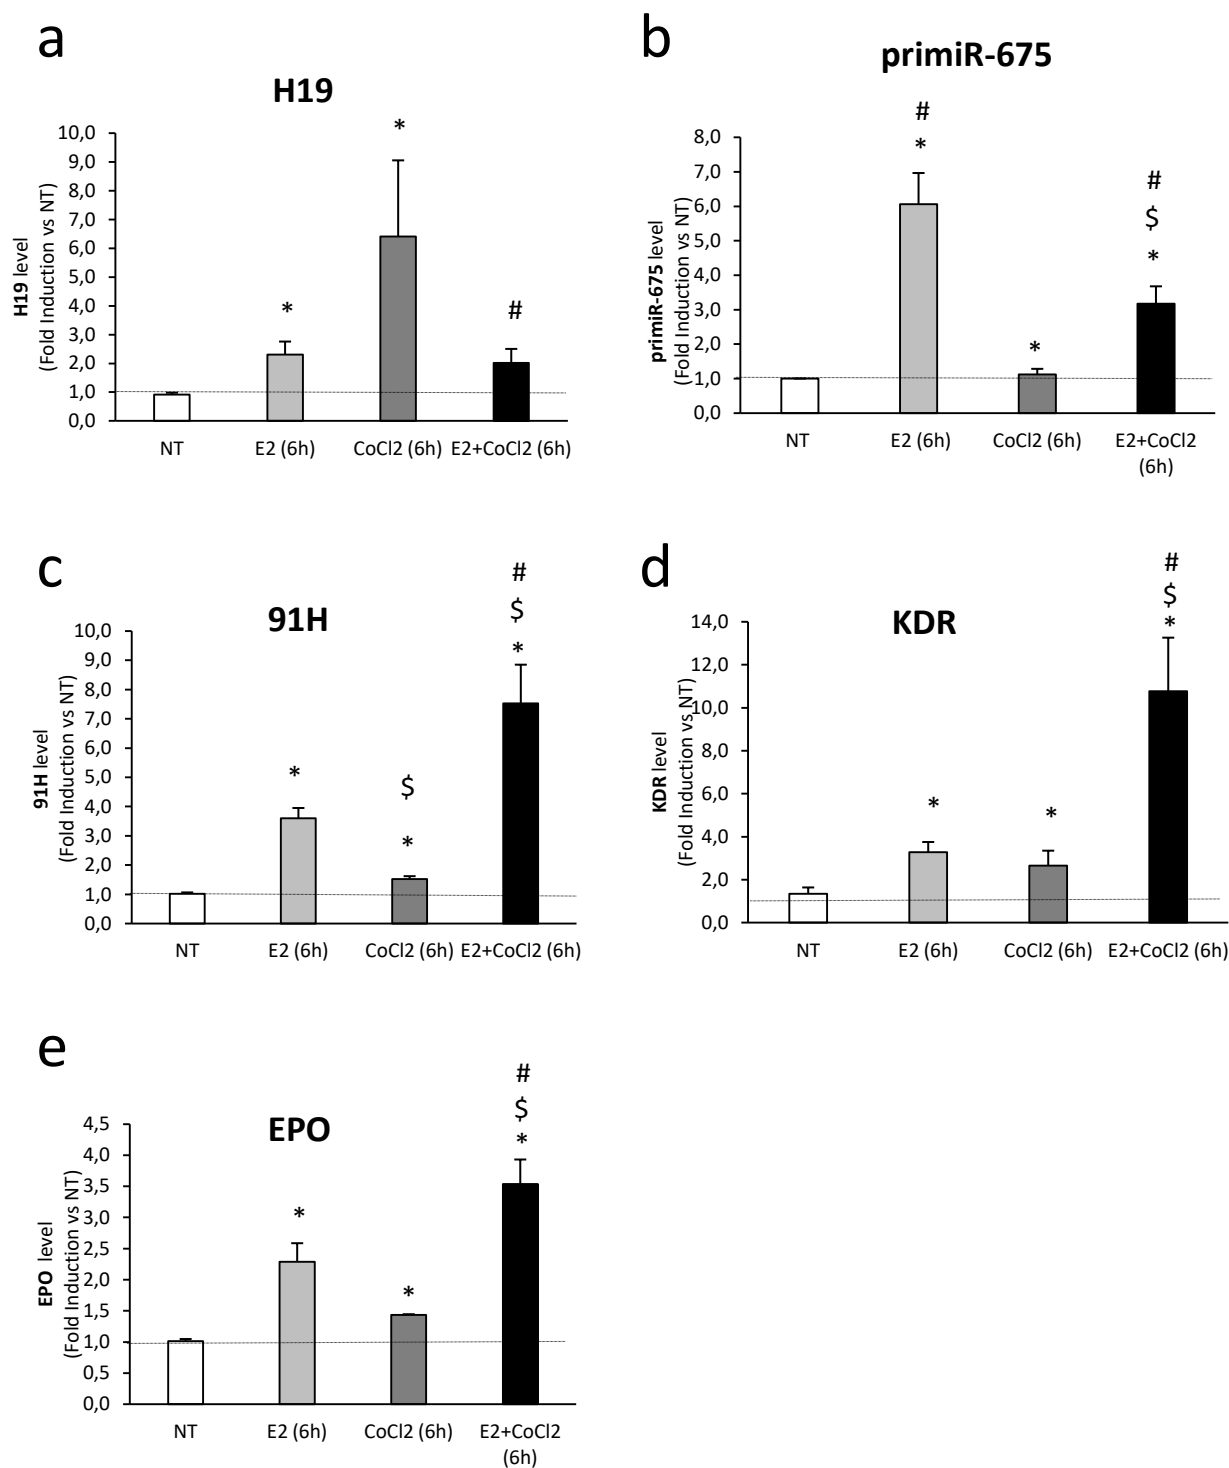

**Figure S3. Opposite transcripts of H19 gene locus are differentially regulated after chemical hypoxia and estrogen treatment while combined treatment have a synergistic effect on the classical hypoxia target gene.** H19 (a), primiR-675 (b), 91H (c), KDR (d) and EPO (e) levels were assessed by quantitative RT-PCR in C27IM after 6 hours treatment with E2 ( $10^{-7}$ M) and CoCl2 (100 $\mu$ M) alone or in combination. Data, plotted as fold induction, represent mean  $\pm$  SEM of 3 experiments. \* $p < 0,05$  vs NT; \$  $p < 0,05$  vs E2; #  $p < 0,05$  vs CoCl2.

a

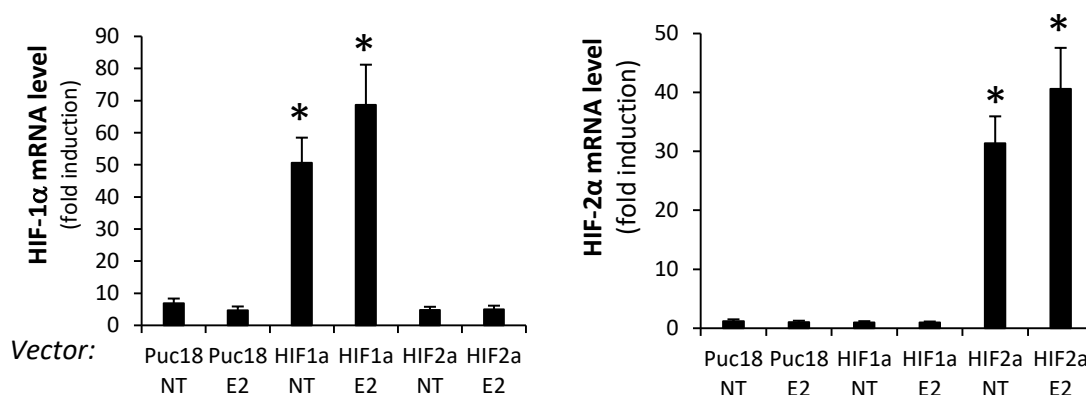

b

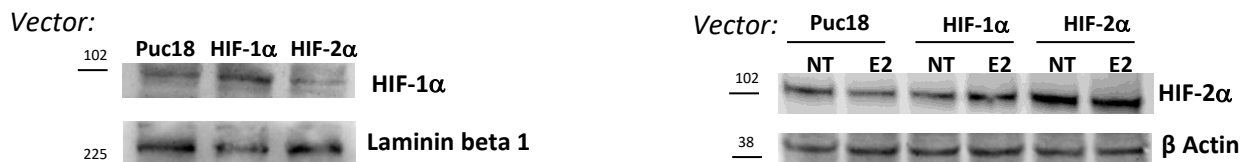

**Figure S4. Evaluation of HIF-1α and HIF-2α overexpression in C27IM cells.** a-b) C27IM cells were transfected for 72h with HIF-1α or HIF-2α expression vectors. The empty vector Puc18 (Puc18) was used as negative control. a) HIF-1α and HIF-2α mRNA levels were quantified by qPCR in presence or absence of E2 ( $10^{-7}$ M; 6 hours) using primers specific to HIF-1α (left) or HIF-2α (right). Data, plotted as fold induction vs NT, represent mean  $\pm$  SEM of 3 experiments. \* $p < 0,05$  vs Puc18; b) Western blot of HIF-1α (left) or HIF-2α (right).  $\beta$  Actin or Laminin beta 1 served as loading control. Molecular weight marker is indicated.

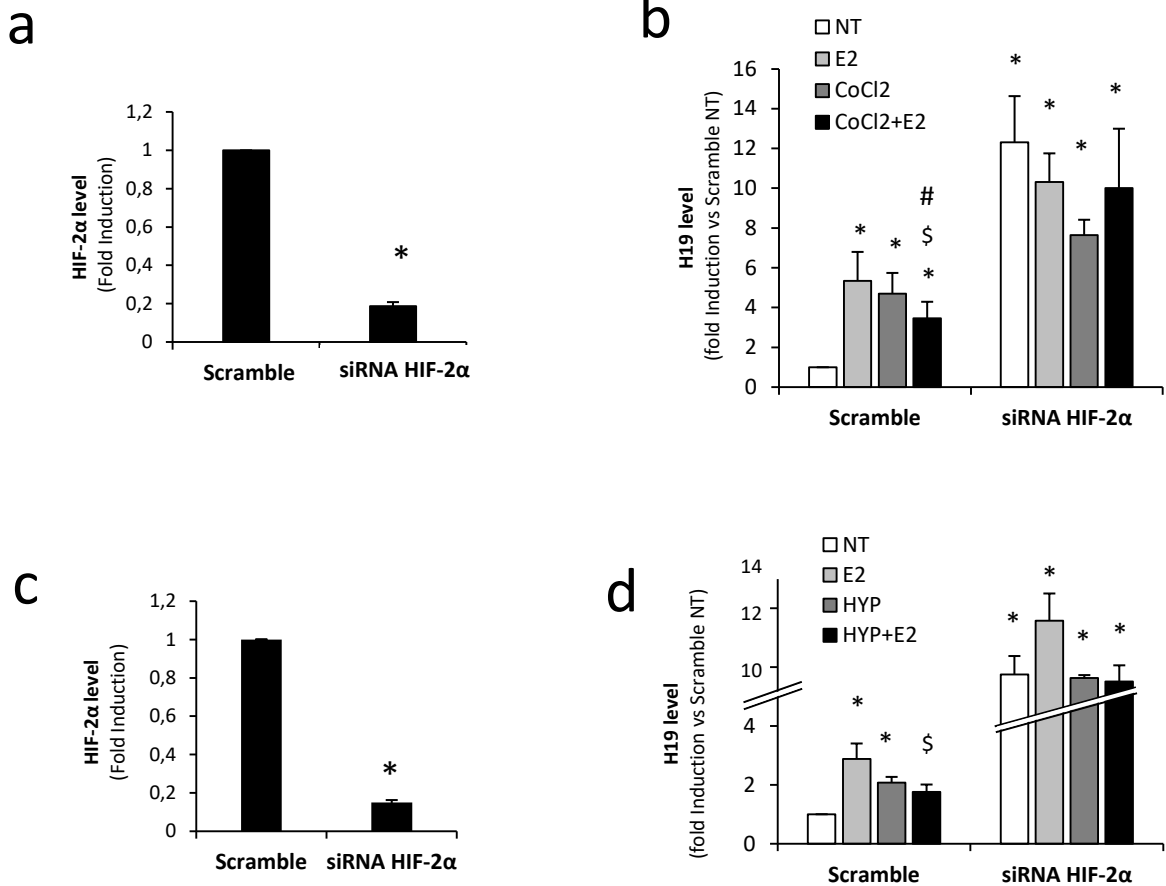

**Figure S5. Effect of HIF-2α silencing on H19 expression.** a and c) HIF-2α RNA levels quantified by qPCR in 786-O or C27IM respectively, transfected with siRNA specific to HIF-2α (siRNA HIF-2α) or scramble. Data, plotted as fold induction siRNA HIF-2α vs scramble, represent mean  $\pm$  SEM of 3 experiments. \* $p < 0,05$  vs Scramble. b and d) H19 RNA levels quantified by qPCR in 786-O or C27IM transfected with siRNA specific to HIF-2α (siRNA HIF-2α) or scramble and treated with estrogen (E2,  $10^{-7}$ M) or hypoxia (CoCl2 or HYP), alone or in combination (CoCl2+E2) for 6h. Data, plotted as fold induction siRNA HIF-2α vs scramble NT, represent mean  $\pm$  SEM of 3 experiments. \* $p < 0,05$  vs NT scramble; \$  $p < 0,05$  vs E2 scramble; #  $p < 0,05$  vs CoCl2 scramble.

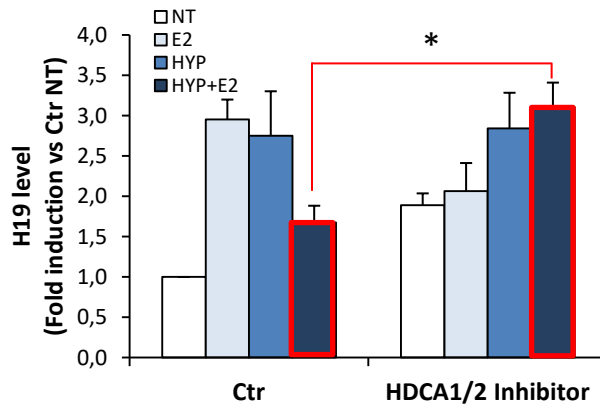

**Figure S6. Effects of HDAC1/2 inhibitor on H19 expression under combined treatment.** H19 levels assessed by qPCR in C27IM after 6 hours treatment with E2 or HYP, alone or in combination, in the presence or absence of inhibitor specific to HDAC1/2 (Mocetinostat2HBr, 1 $\mu$ M) added 30 min before E2 and/or HYP. Data, plotted as fold induction vs NT/Ctr, represent mean  $\pm$  SEM of 3 experiments. \* $p < 0,05$ .

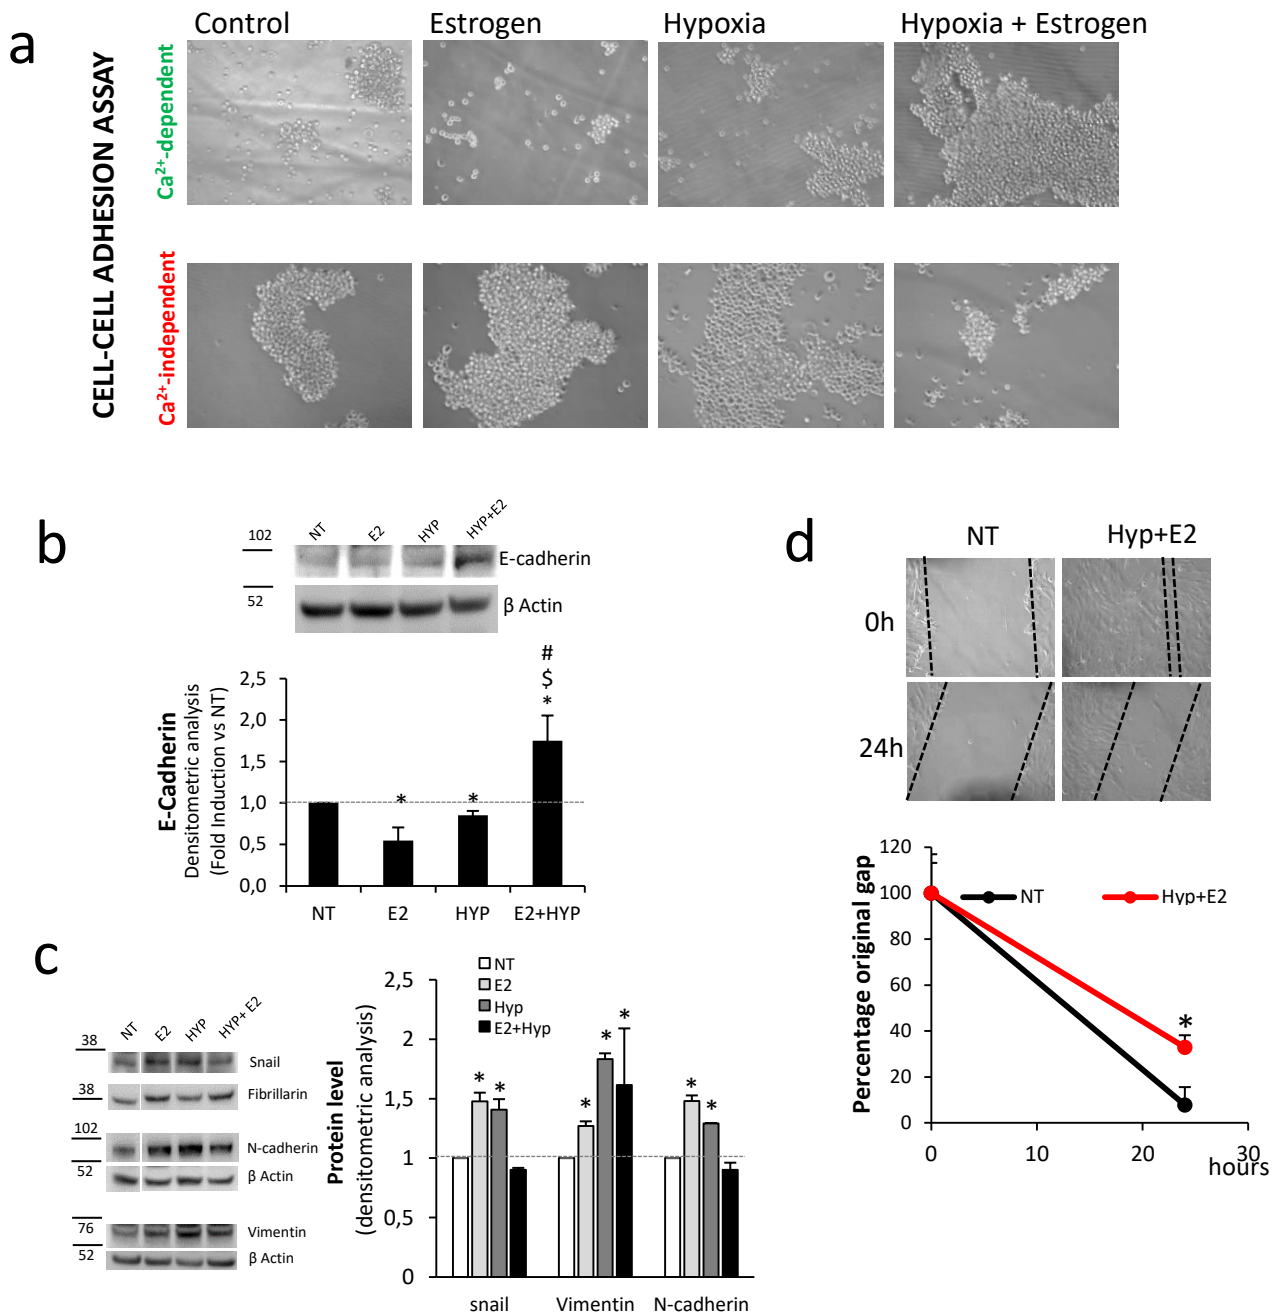

**Figure S7. Cell to cell adhesion assay, expression of E-cadherin and EMT-related genes and scratch-test upon estrogen and hypoxia.** a) Representative phase contrast images (bright field) of cell-cell adhesion assay performed in presence ( $\text{Ca}^{2+}$ -dependent) or in absence ( $\text{Ca}^{2+}$ -independent) of 1mM  $\text{Ca}^{2+}$  as in Figure 3a and b. b-d) Expression of EMT-related genes after 18 hours treatment with  $\text{E}_2$  ( $10^{-7}\text{M}$ ) or 1%  $\text{O}_2$  hypoxia (HYP), alone or in combination. b) Protein level analysis of E-cadherin in C27IM by western blot.  $\beta$  Actin was used as control. Molecular weight marker is indicated. Upper panel: representative experiment. Lower panel: densitometric analysis, reported as fold induction vs NT, represent mean  $\pm$  SEM of 3 experiments. \* $p < 0,05$  vs NT, \$  $p < 0,05$  vs E2, #  $p < 0,05$  vs HYP. c) Protein level analysis of EMT-related genes, the E-cadherin transcriptional repressor SNAIL (on nuclear extracts), Vimentin and N-cadherin (on cytoplasmic extracts) in C27IM by western blot. Fibrillarin or  $\beta$  Actin were used as control. Molecular weight marker is indicated. Left panels: representative experiments. Right panels: densitometric analysis, reported as fold induction vs NT, represent mean  $\pm$  SEM of 3 experiments. \* $p < 0,05$  vs NT. White bars indicate non contiguous lines of same gel. d) Representative phase contrast images in bright field of a scratch test (upper panel) and its quantification (lower panel) before and after 24 hours under normoxia (NT) or combined treatment estrogen ( $\text{E}_2$ ,  $10^{-7}\text{M}$ ) plus 1%  $\text{O}_2$  hypoxia (Hyp+E2). Results are expressed as percentage of original gap. Data represent mean  $\pm$  SEM of 3 independent experiments. \*  $p < 0,05$  vs NT.

a

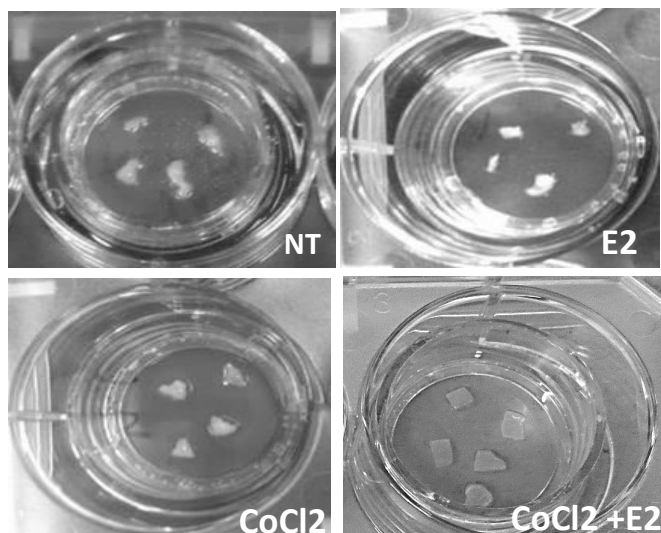

b

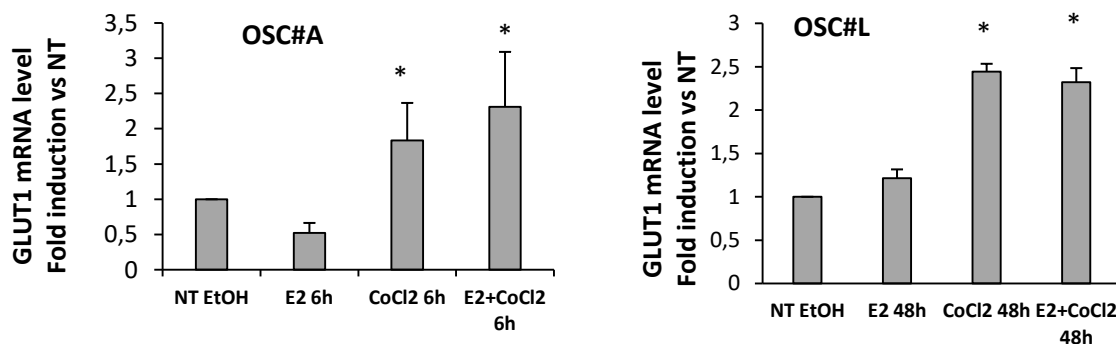

c

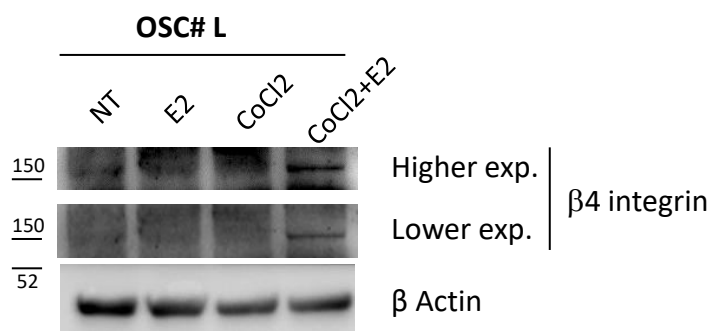

**Figure S8. *Ex vivo* Organotypic Slice Cultures (OSCs) of prostate tumors, GLUT1 and  $\beta 4$  integrin expression under combined treatment.** a) Representative images of set of Organotypic Slices (OSCs) after 3 days. OSCs were treated with  $17\beta$ -estradiol ( $10^{-7}$ M, E2) or CoCl<sub>2</sub> (300 $\mu$ M) alone or in combination before harvesting. b) GLUT1 mRNA levels quantified by qRT-PCR in PCa-derived OSCs after 6 hours (left) or 48 hours (right) treatment with E2 and/or CoCl<sub>2</sub>, alone or in combination. Data, plotted as fold induction vs NT, shows a representative OSC. \*  $p < 0,05$  vs NT. c)  $\beta 4$  integrin protein level assessed in OSC#10 after 48 hours treatment with E2 and/or CoCl<sub>2</sub> alone or in combination performed by western blot. Two different exposure (Higher and Lower exp.) are showed.  $\beta$  Actin was used as control. Molecular weight marker is indicated.



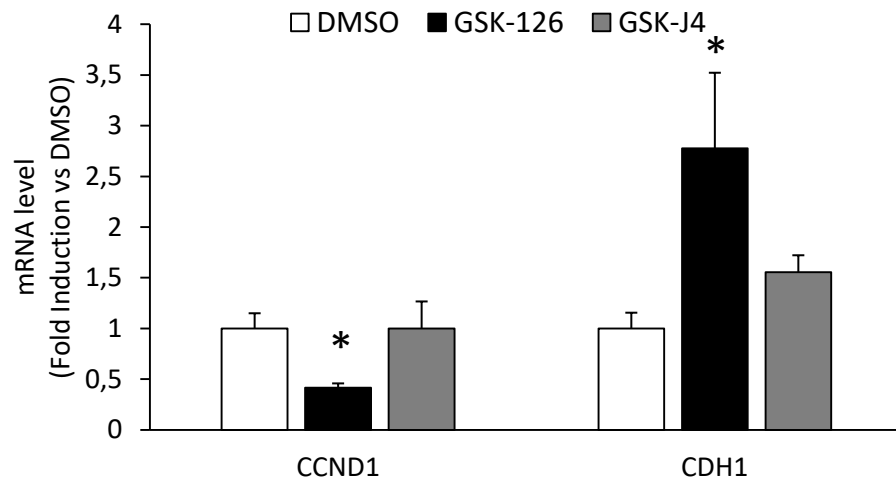

**Figure S9. Modulation of EZH2-target genes E-cadherin and cyclin D1 upon EZH2 or JMJD3 inhibitors.** Cyclin D1 (CCND1) and E-cadherin (CDH1) levels were assessed by qPCR in C27IM after 18 hours treatment with estrogen (E2;  $10^{-7}$ M), 1% O<sub>2</sub> hypoxia (HYP), alone or in combination, in the presence or absence of inhibitors to EZH2 (GSK-126, 1 $\mu$ M) or JMJD3 (GSK-J4, 1 $\mu$ M) added 30 min before E2 and/or HYP. Data, plotted as fold induction vs DMSO, represent mean  $\pm$  SEM of 3 experiments. \*  $p < 0,05$  vs DMSO.

# Bacci et al. IJMS #582123 \_Figure S4b uncropped

Vector: Puc18 HIF-1 $\alpha$  HIF-2 $\alpha$

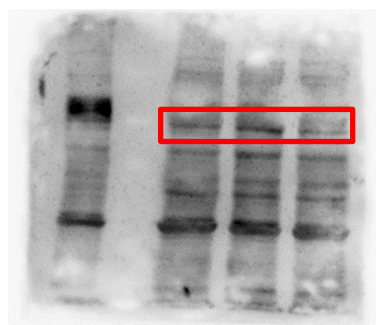

HIF-1 $\alpha$

Gel #1 (left panel)

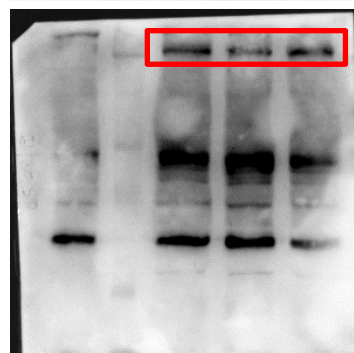

Laminin beta 1

1 2 3 4 5

**Uncut gels related to WB depicted in Supplementary Figure 4b, left panel.** Whole membrane blots of western blot analysis (7.5 % acrylamide gel ) related to HIF-1 $\alpha$  (upper) and Laminin beta1 (lower) in PCa cells (C271M, lanes 3-5, 40 $\mu$ g) nuclear extracts before/after overexpression of HIF1 $\alpha$  or HIF2 $\alpha$ , as indicated. Lane 1 is loaded with C271M treated with CoCl<sub>2</sub> as positive control for HIF-1 $\alpha$  (10 $\mu$ g). Lane 2 is loaded with MW marker. Images of selected portions shown in the original Figure S4b are highlighted in red.

Vector: puc18 HIF-1 $\alpha$  HIF-2 $\alpha$   
NT E2 NT E2 NT E2

Gel #2 (right panel)

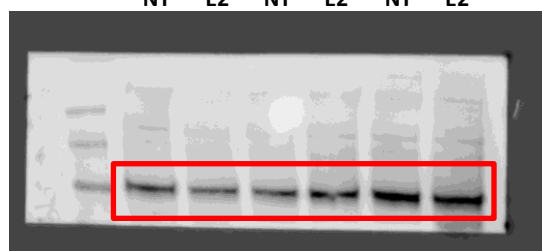

HIF-2 $\alpha$

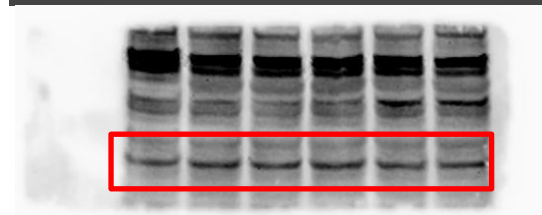

$\beta$  Actin

1 2 3 4 5 6 7

**Uncut gels related to WB depicted in Supplementary Figure 4b, right panel.** Whole membrane blots of western blot analysis (4-12% acrylamide gel) related to HIF-2 $\alpha$  (upper) and  $\beta$ -actin (lower) in PCa cells (C271M, lanes 2-7) total lysates before/after overexpression of HIF1 $\alpha$  or HIF2 $\alpha$ , as indicated. Lane 1 is loaded with MW marker. Images of selected portions shown in the original Figure S4b are highlighted in red.

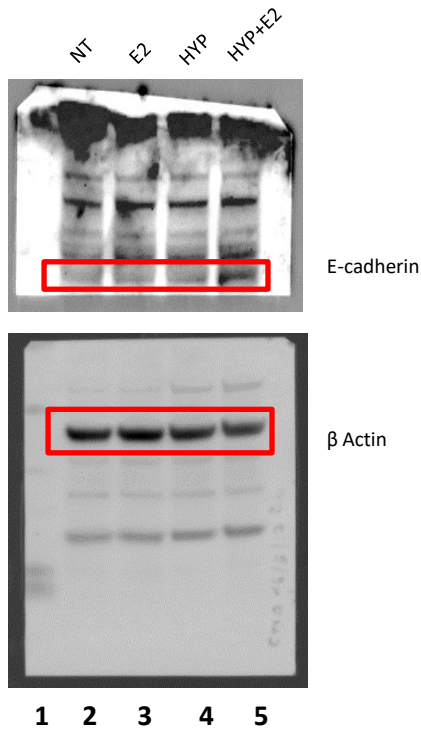

**Uncut gels related to WB depicted in Supplementary Figure 7b.** Whole membrane blots of western blot analysis (4-12 % acrylamide gel) related to E-cadherin (upper) and  $\beta$  Actin (lower) in PCa cells (C27IM, lanes 2-5) cytosolic extracts in untreated or upon E2, Hypoxia, or E2+Hypoxia treatment as indicated in the Figure S7 Legend. Lane 1 is loaded with MW marker. Images of selected portions shown in the original Figure S7b are highlighted in red.

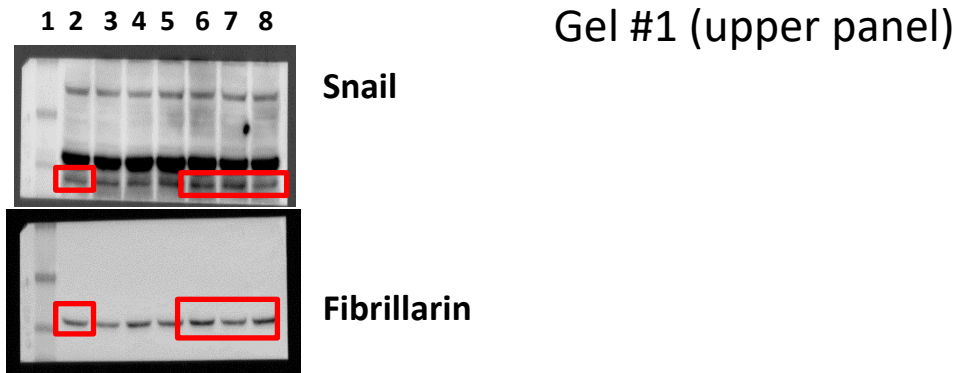

**Uncut gels related to WB depicted in Supplementary Figure 7c.** Whole membrane blots of western blot analysis (4-12 % acrylamide gel ) related to Snail (upper) and Fibrillarin (lower) in PCa cells (C27IM, lanes 2-8) nuclear extracts in untreated or upon E2, Hypoxia, or E2+Hypoxia treatment as indicated in the Figure S7 Legend. Lane 1 is loaded with MW marker. Images of selected portions shown in the original Figure S7c are highlighted in red.

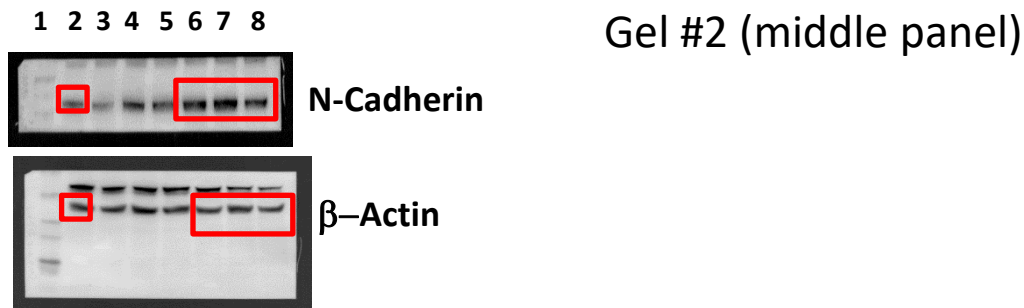

**Uncut gels related to WB depicted in Supplementary Figure 7c.** Whole membrane blots of western blot analysis (4-12 % acrylamide gel ) related to N-Cadherin (upper) and  $\beta$ -Actin (lower) in PCa cells (C27IM, lanes 2-8) cytosolic extracts in untreated or upon E2, Hypoxia, or E2+Hypoxia treatment as indicated in the Figure S7Legend. Lane 1 is loaded with MW marker. Images of selected portions shown in the original Figure S7c are highlighted in red.

Gel # 3 (lower panel)

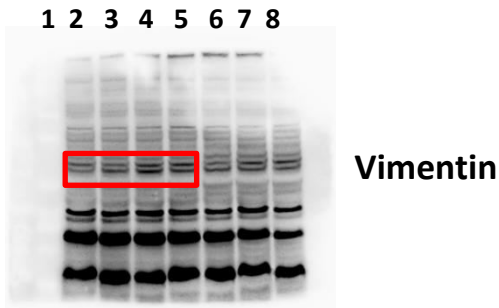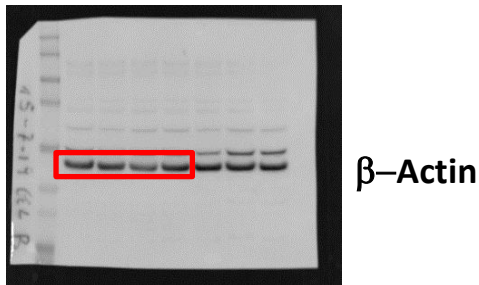

**Uncut gels related to WB depicted in Supplementary Figure 7c.** Whole membrane blots of western blot analysis (4-12 % acrylamide gel ) related to Vimentin (upper) and  $\beta$ -Actin (lower) in PCa cells (C27IM, lanes 2-8) cytosolic extracts in untreated or upon E2, Hypoxia, or E2+Hypoxia treatment as indicated in the Figure S7 Legend. Lane 1 is loaded with MW marker. Images of selected portions shown in the original Figure S7c are highlighted in red.

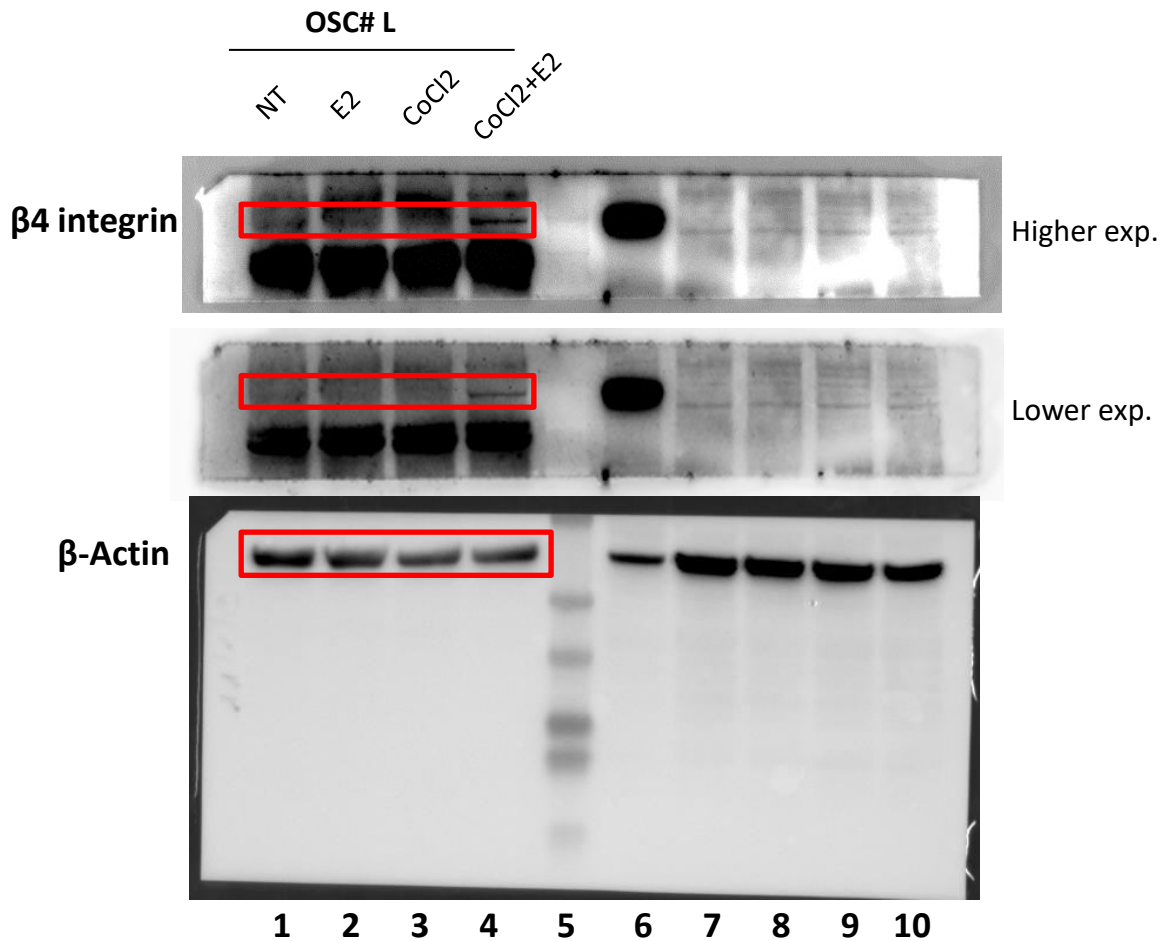

**Uncut gels related to WB depicted in Supplementary Figure 8c.** Whole membrane blots of western blot analysis (4-12 % acrylamide gel ) related to N-Cadherin (upper) and β-Actin (lower) in Organotypic Slice Culture #L (lanes 1-4) whole tissue extracts before or after E2, Hypoxia, or E2+Hypoxia treatment as indicated in the S8 Figure Legend. Lane 5 is loaded with MW marker and lane 6 with MCF7 as positive control. Images of selected portions shown in the original Figure S8c are highlighted in red.

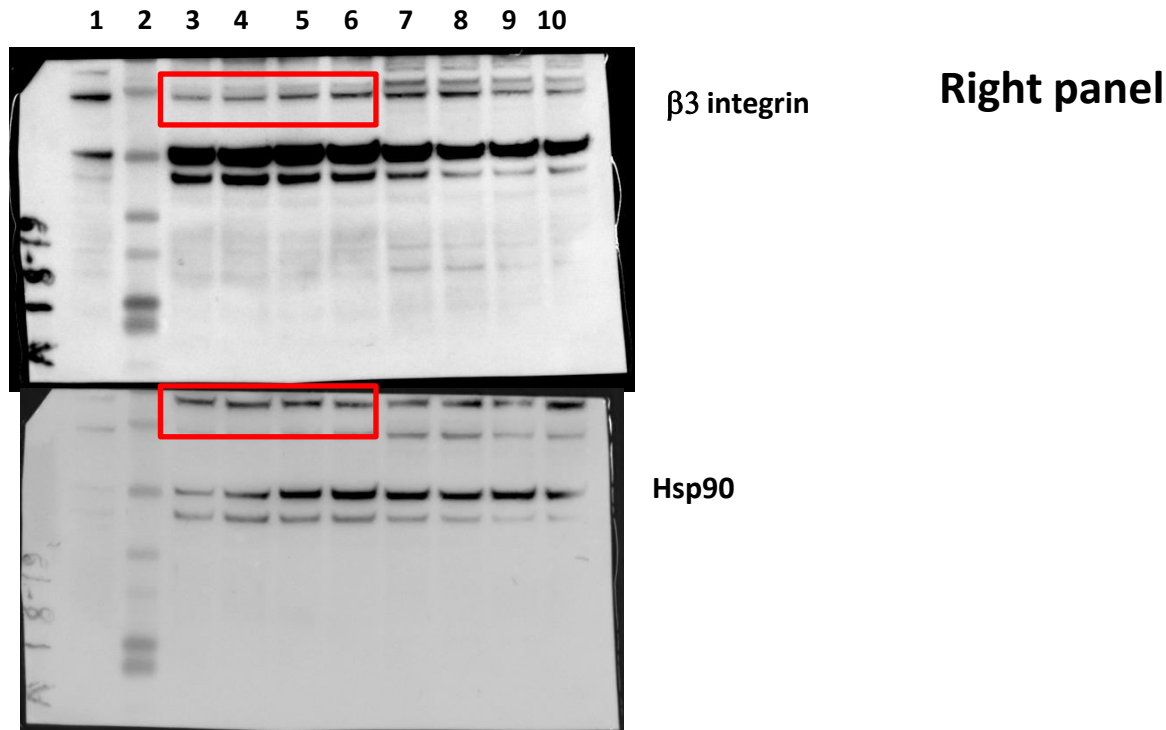

**Uncut gels related to WB depicted in Figure 3e.** Whole membrane blots of western blot analysis (4-12% acrylamide gel) related to  $\beta 3$  integrin (upper) and Hsp90 (lower) in MCF7 (lane 1) or PCa cells (C27IM, lanes 3-10) cytosolic lysates in untreated or upon E2, Hypoxia, or E2+Hypoxia treatment as indicated in the Figure 3. Lane 2 is loaded with MW marker. Images of selected portions shown in the original Figure 3e are highlighted in red.

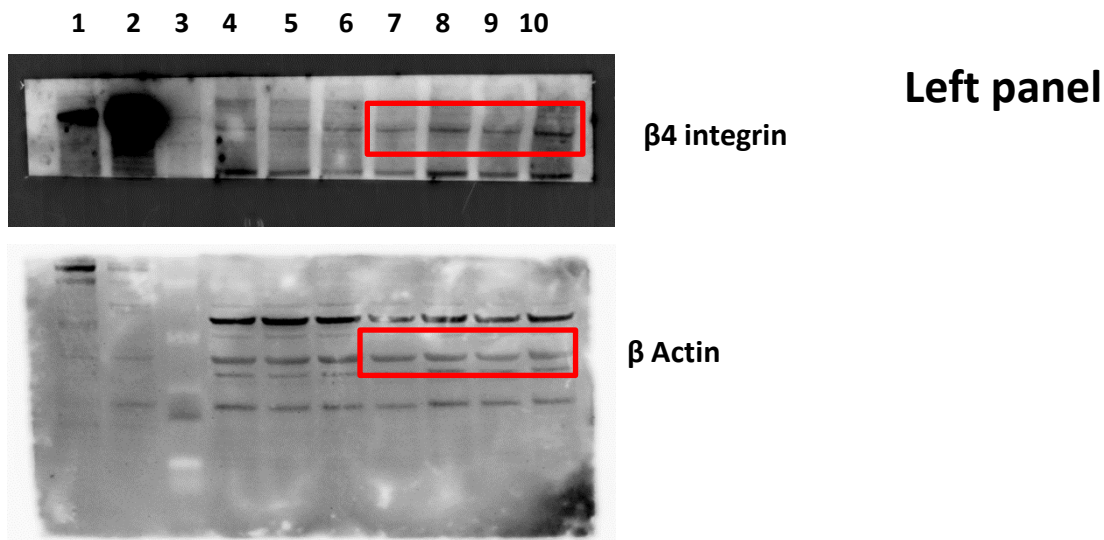

**Uncut gels related to WB depicted in Figure 3e.** Whole membrane blots of western blot analysis (4-12% acrylamide gel) related to  $\beta 4$  integrin (upper) and  $\beta$  Actin (lower) in MCF7 or in  $\beta 4$  integrin positive control (lane 1-2) or PCa cells C27IM (lanes 4-10) cytosolic lysates in untreated or upon E2, Hypoxia, or E2+Hypoxia treatment as indicated in the Figure 3. Lanes 3 is loaded with MW marker. Images of selected portions shown in the original Figure 3e are highlighted in red.

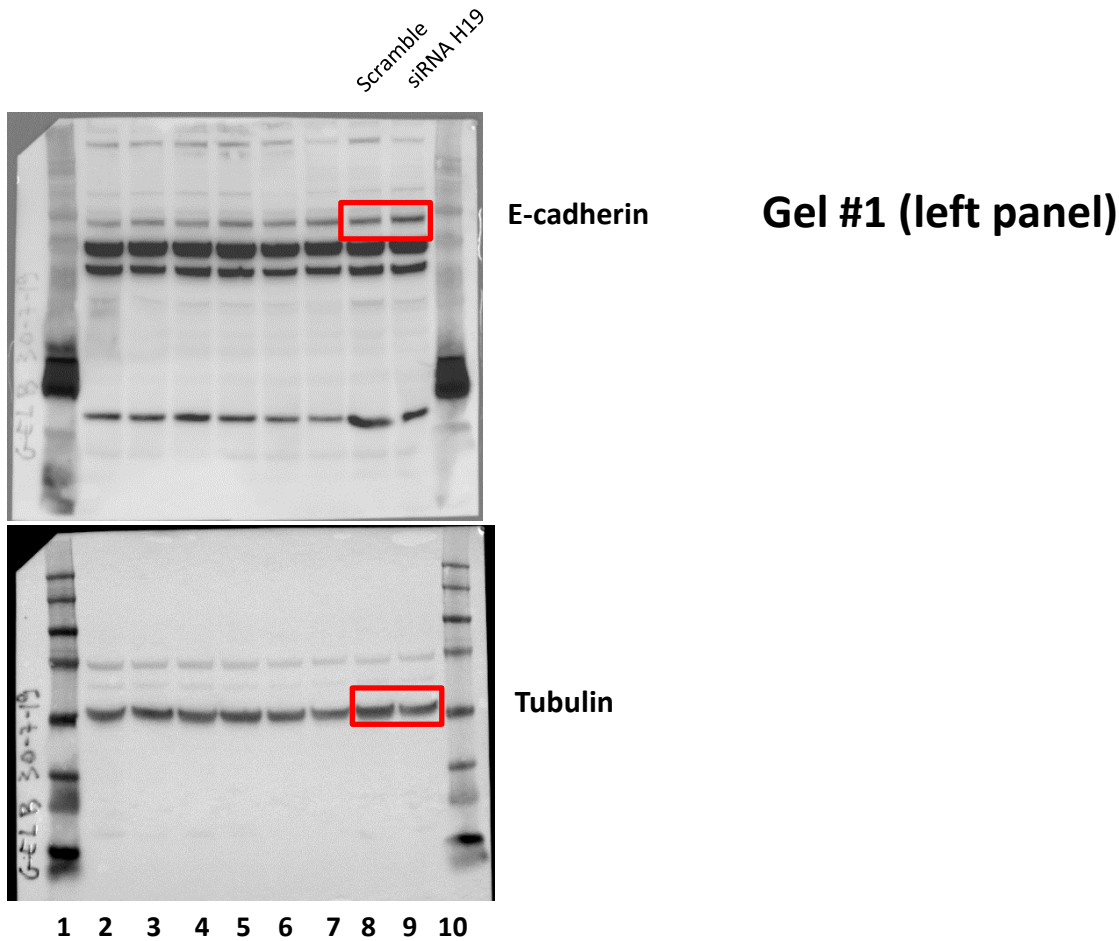

**Uncut gels related to WB depicted in Figure 4d (left panel).** Whole membrane blots of western blot analysis (4-12% acrylamide gel) related to E-cadherin (upper) and Tubulin (lower) in PCa cells C27IM (lanes 2-9) cytosolic lysates. Lanes 1 and 10 is loaded with MW marker. Images of selected portions, lanes 8 and 9, shown in the original Figure 4d are highlighted in red.



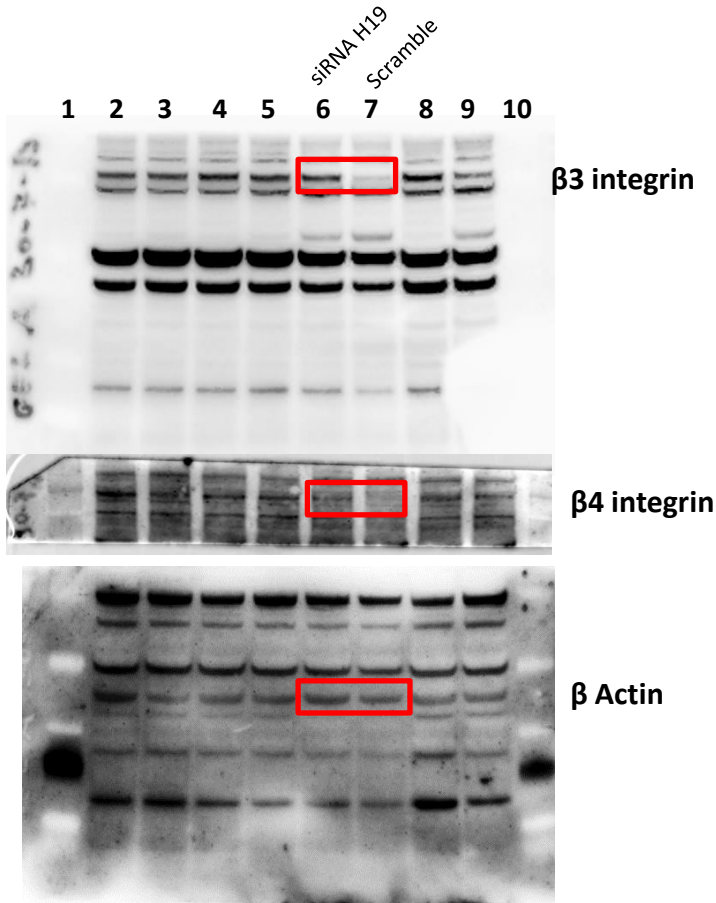

Gel #2 (right panel)

**Uncut gels related to WB depicted in Figure 4d (right panel).** Whole membrane blots of western blot analysis (4-12% acrylamide gel) related to  $\beta 3$  integrin (upper),  $\beta 4$  integrin (middle) and  $\beta$  Actin (lower) in PCa cells C27IM (lanes 2-9) cytosolic lysates. Lanes 1 and 10 is loaded with MW marker. Images of selected portions, lanes 6 and 7, shown in the original Figure 4d are highlighted in red.
